# Supplementary material
Source: Elsevier journal article supplement (https://www.sciencedirect.com/science/article/pii/S0212656718305626)
Supplement: mmc1 [file S0212656718305626:mmc1.docx]

**MATERIAL COMPLEMENTARIO**

**Guía de las entrevistas individuales y grupales**

| ***Presentación a los/as entrevistados/as****: En la asistencia diaria se presentan personas que consultan por diferentes circunstancias con una gran carga emocional, que muchas veces se suelen acompañar de llanto. Son consultas que requieren un máximo respeto y en las que el tiempo debería detenerse, sin permitir interrupciones, por lo que las hemos calificado como “consultas sagradas”.*  • ¿Qué pensáis vosotros de este tipo de consultas? ¿Puedes darnos algún ejemplo de lo que son este tipo de consultas para ti?  • ¿Las dominaríais como consultas sagradas? ¿Por qué? ¿Cómo las denominaríais?  • ¿Cómo identificas este tipo de consulta? ¿Algún elemento o señal que te ponga sobre aviso de que estás ante una consulta sagrada?  • ¿El que el/la paciente llore creéis que hace que la consulta sea especial o diferente a otro tipo de encuentros con los pacientes? ¿Por qué?  • ¿Pensáis que son frecuentes? ¿Se podrían cuantificar?  • ¿Creéis que estas consultas están condicionadas por algunas circunstancias? Cuáles serían esas circunstancias según vuestra experiencia?  • ¿Crees que algunos profesionales tienes más consultas sagradas que otros? ¿De qué crees que depende esta variabilidad? ¿Dónde suelen presentarse este tipo de consultas: en nuestra consulta, en el domicilio, en los pasillos, en la calle...?  • ¿Qué creéis que esperan los pacientes de vosotros en estas situaciones?  • ¿Y vosotros qué hacéis? ¿Por qué?  • ¿Cómo os sentís cuando se producen este tipo de consultas? ¿Y cómo os sentís después de que se haya producido?  • Relata la experiencia de comunicación con el paciente ante una consulta sagrada, qué hiciste y cómo te sentiste.  • ¿Pensáis que lo hacéis bien? ¿Podríais mejorar? ¿En qué se podría mejorar? ¿Cómo?  • ¿El hecho de que se haya producido una consulta sagrada, cambia tu relación posterior con el paciente?  • ¿Creéis que lo que habéis contado es compartido por el resto de los médicos de familia de vuestros centros?  • Si tuvierais que elaborar un programa de formación para un estudiante o residente de medicina de familia, ¿qué incluirías en referencia a las competencias y habilidades necesarias para este tipo de consultas?  • ¿Consideráis que este tipo de consultas también se producen con otros profesionales sanitarios de atención primaria? ¿Y de la atención hospitalaria?  • ¿Queréis hacer alguna aportación más sobre lo que se ha estado comentando o algo que consideréis que aún no ha surgido y sea relevante? |
| --- |
